# Supplementary material for: Fast and slow integrated single-molecule dual dielectric switch based on a crystal/flexible thin film
Source: Royal Society of Chemistry journal article supplement (doi:10.1039/c7tc02087b), 2017-01-01
Supplement: c7tc02087b1.pdf [file c7tc02087b1.pdf]

## Fast and slow integrated single-molecule dual dielectric switch based on crystal/flexible thin film

Chang Xu, Wan-Ying Zhang, Cheng Chen, Qiong Ye\*, Da-Wei Fu\*

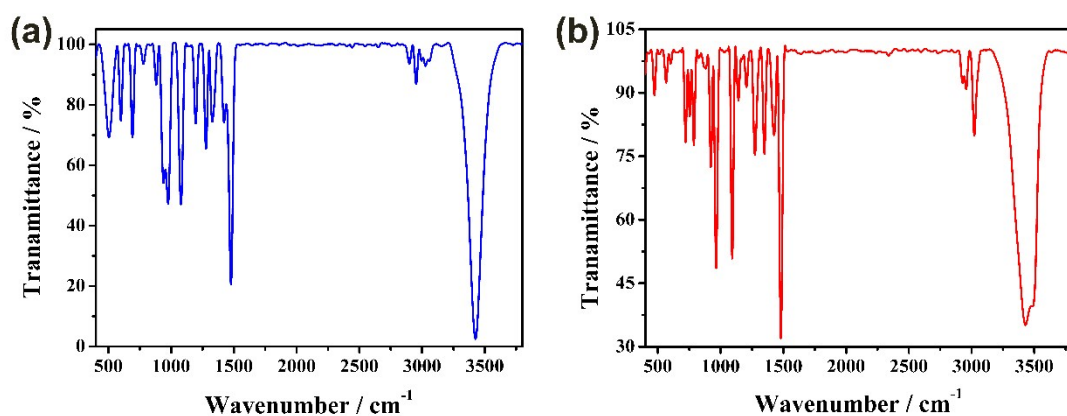

**Fig. S1** Infrared spectrum of compound 1 (a) and 2 (b). Description: The IR spectra of 1 and 2 definitely show the existence of typical strong stretching vibration peaks of C-N at 1000-1200 cm<sup>-1</sup>, the C-Cl stretching vibration at 600-800 cm<sup>-1</sup>, and the N-H/C-H stretching vibration at 2800-3200 cm<sup>-1</sup>. In addition, the finger-print region of about 3200-3500 cm<sup>-1</sup> may belong to the stretching vibration of O-H, which serves as indirect proof to the crystalline structure we have obtained.

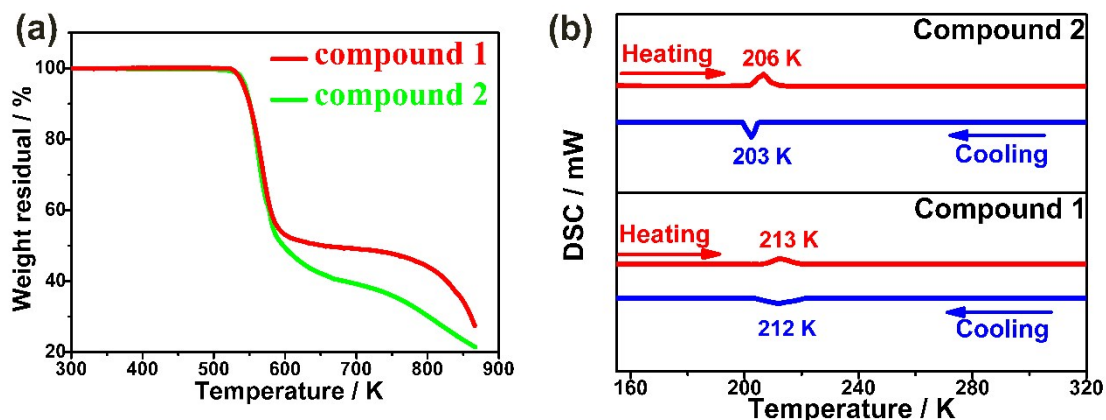

**Fig. S2** (a) TGA curves for 1 (red) and 2 (green). (b) DSC curves of 1 and 2 obtained on a cooling-heating cycle from LTP to RTP.

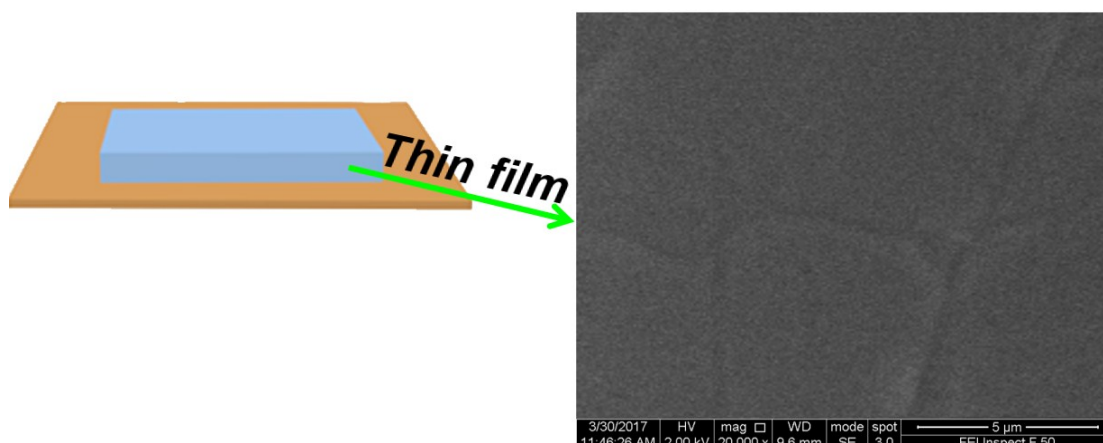

**Fig. S3** The scanning electron microscopy (SEM) topography of compound **2**.

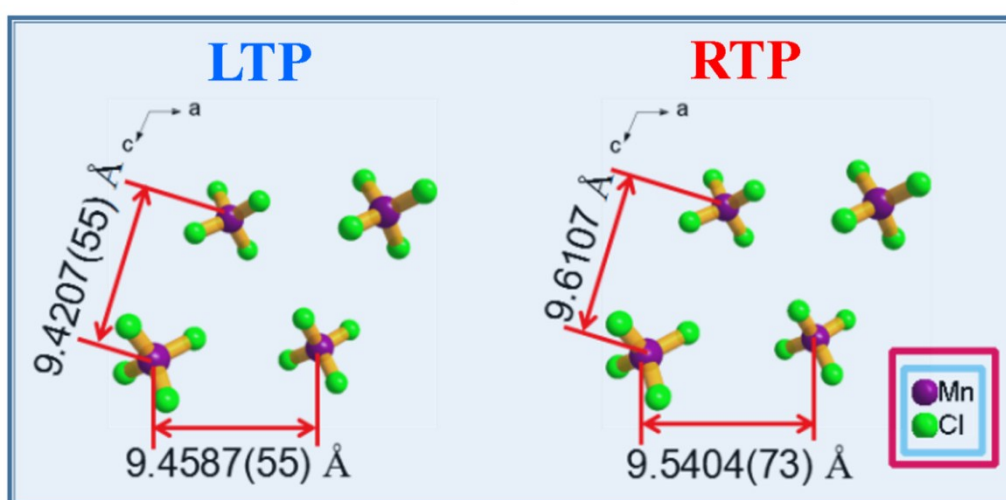

**Fig. S4** Crystal-packing views of compound **2** at LTP (103 K) and RTP (293 K), while other atoms omitted for clarity.

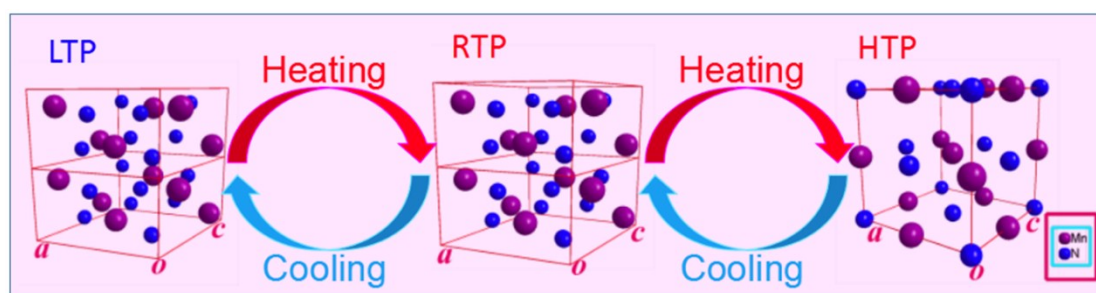

**Fig. S5** Schematic presentations of the positions of N and Mn atoms in (a) LTP at 103 K, (b) RTP at 293 K, and (c) HTP, while other atoms omitted for clarity. The presentation of HTP is a hypothetical state based upon the space group.

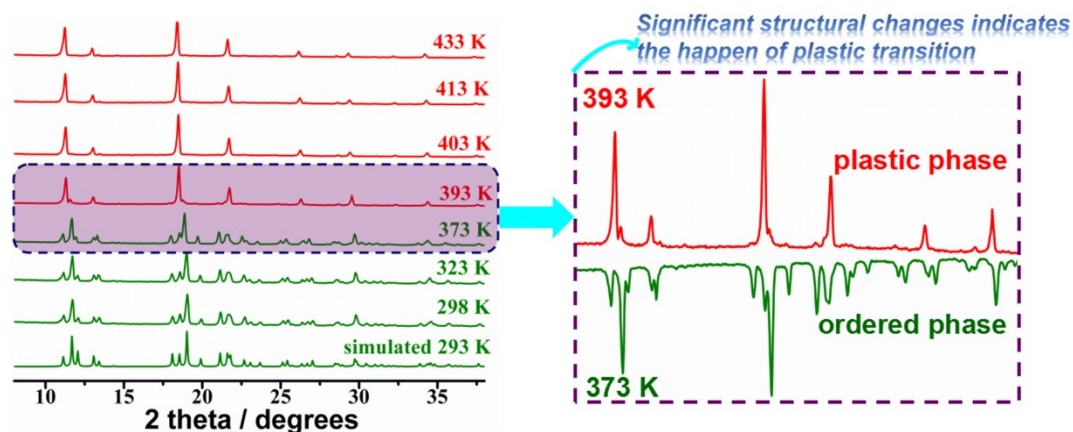

**Fig. S6** Variable-temperature PXRD patterns of **1**, the right picture showed the contrast of plastic phase and ordered phase.

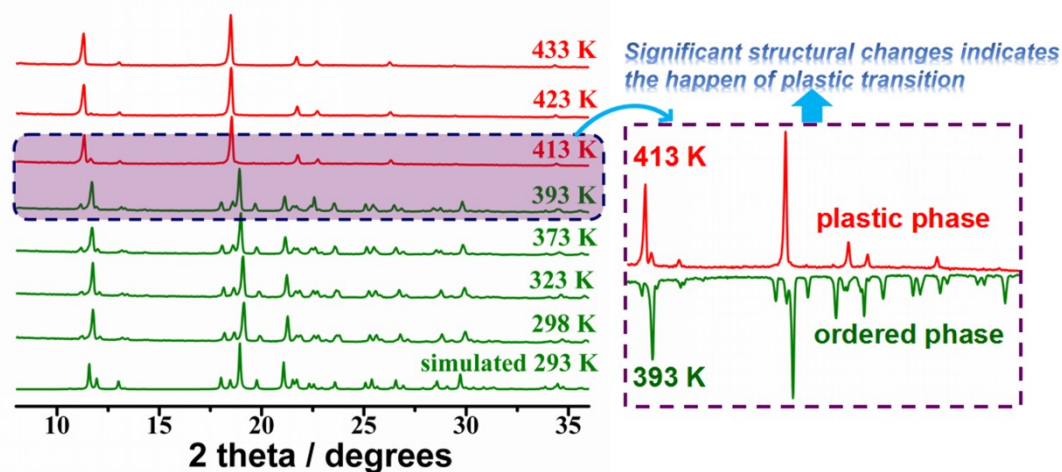

**Fig. S7** Variable-temperature PXRD patterns of **2**, the right picture showed the contrast of plastic phase and ordered phase.

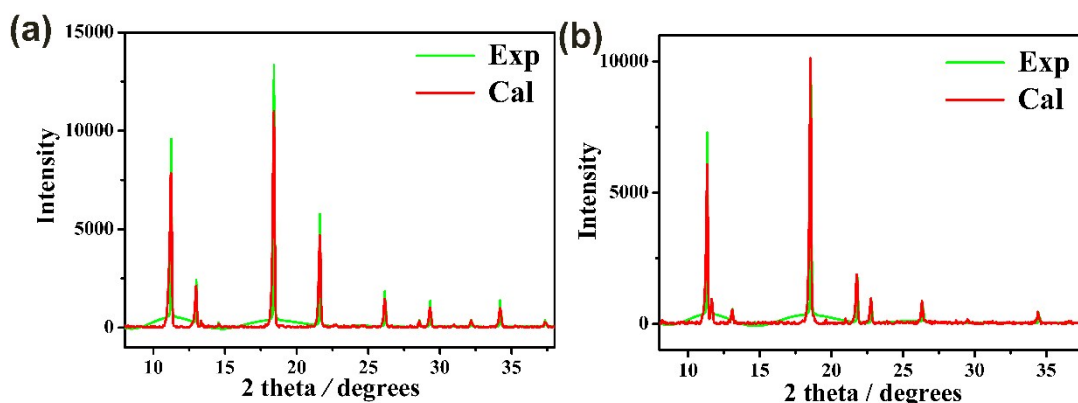

**Fig. S8** Pawley refinement on the PXRD patterns of compound **1** and **2** at 413 K. Experimental pattern (green line), calculated pattern (red line), the appointed unit-cell parameters and space group are got through the calculated peak positions.

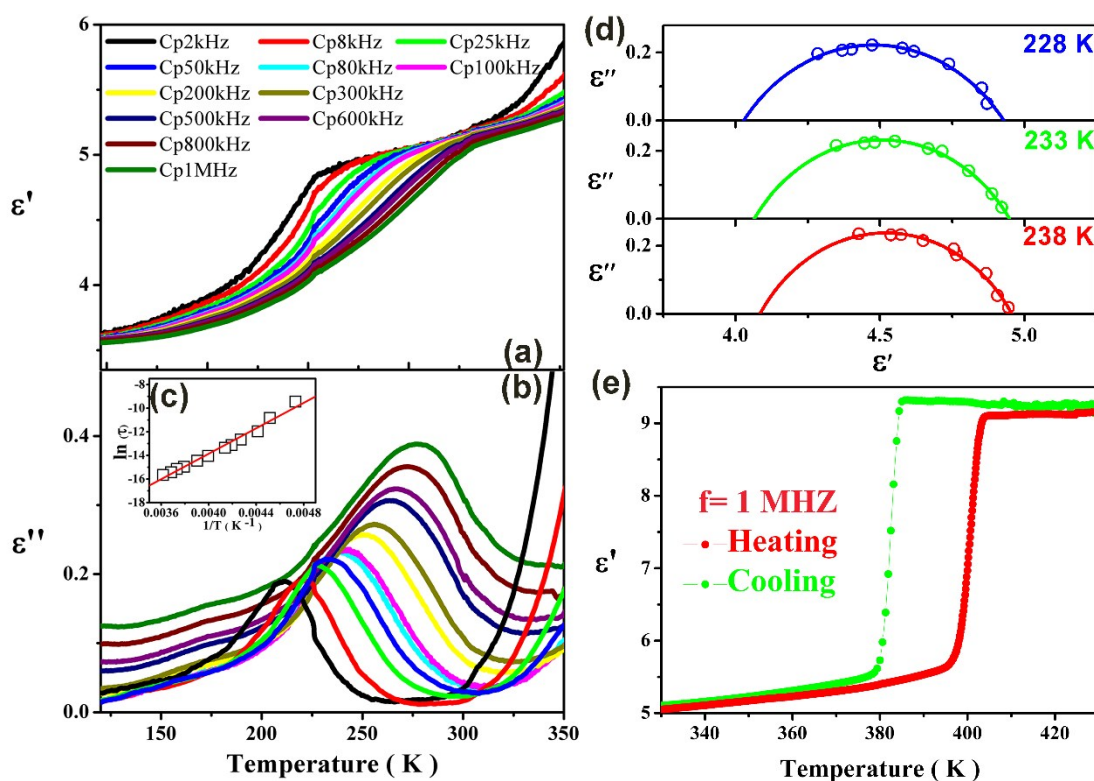

**Fig. S9** (a) Real part ( $\epsilon'$ ) of the dielectric permittivity of Compound **2** as a function of temperature at various frequencies on cooling process for the polycrystalline sample; (b) imaginary part ( $\epsilon''$ ) of the dielectric permittivity measured at different frequencies on cooling course for the polycrystalline sample; (c) Arrhenius plots for the dielectric relaxation on cooling. (d) Cole-Cole diagrams of  $\epsilon''$  versus  $\epsilon'$  for the polycrystalline sample of **2** at three selected temperatures, which shows the relaxation nature of the dielectric dispersion in compound **2**. (e) Temperature-dependence of the real part ( $\epsilon'$ ) of the polycrystalline samples of **2** at 1 MHz upon heating and cooling.

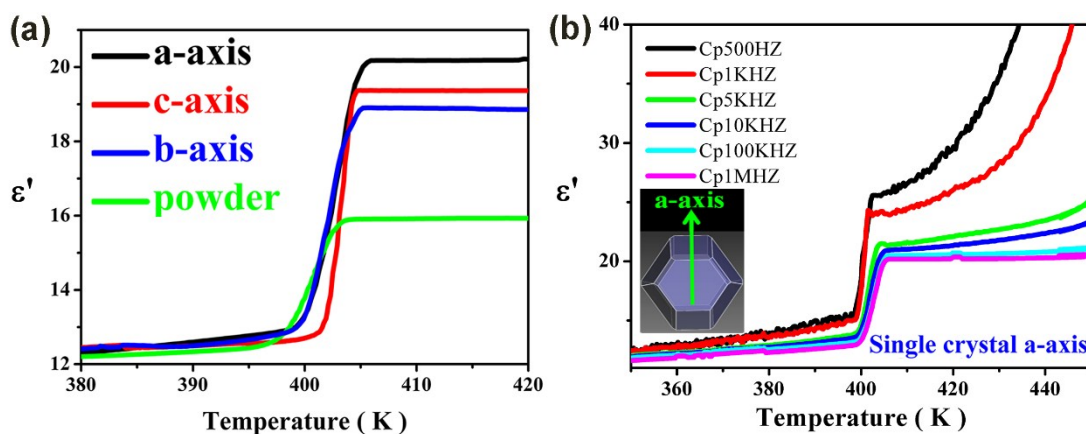

**Fig. S10** (a) Anisotropic dielectric permittivity ( $\epsilon'$ ) of **2** along the a, b, and c axes at 1000 KHz upon heating. (b) Temperature-dependent real part ( $\epsilon'$ ) of the dielectric constant of compound **2**, measured along the a-axis in the frequency range 0.5-1000 KHz upon heating.

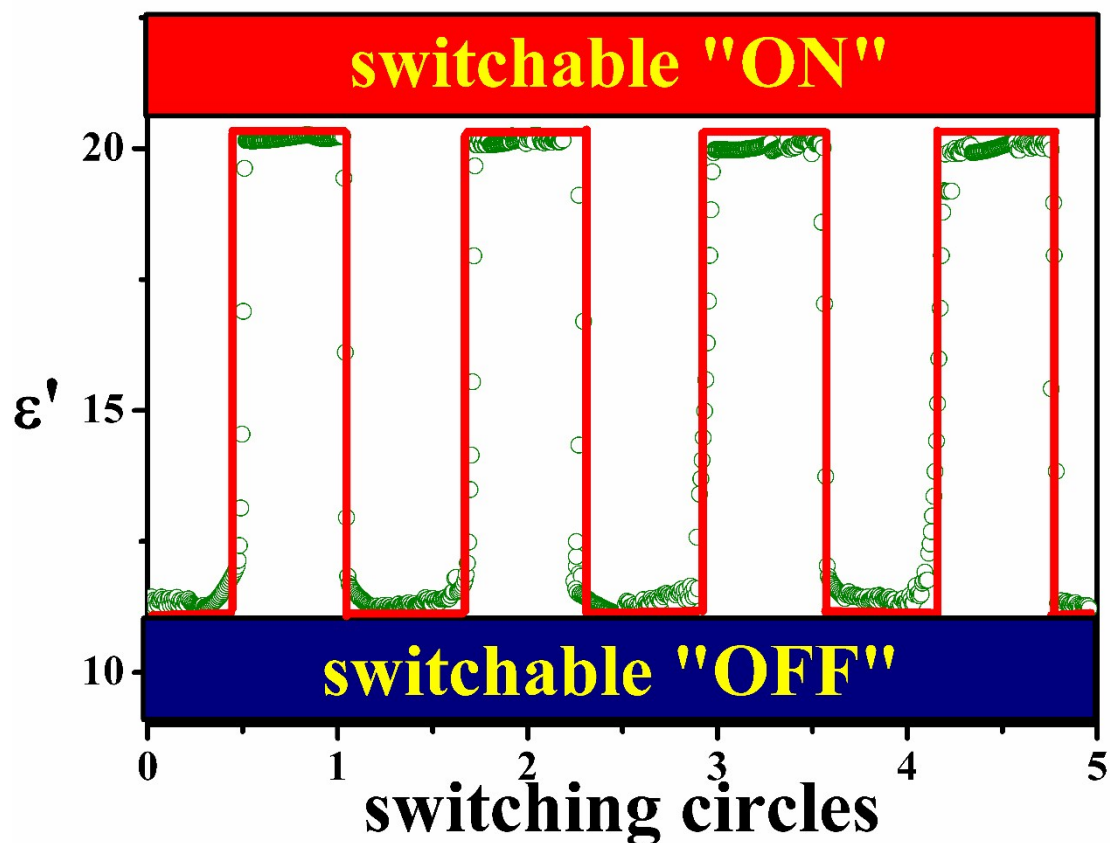

**Fig. S11**  $\epsilon'$ -switching of crystal **2** is completely reversible without wastage after at least four "on"/"off" cycles along a-axis at frequencies of 1 MHz.

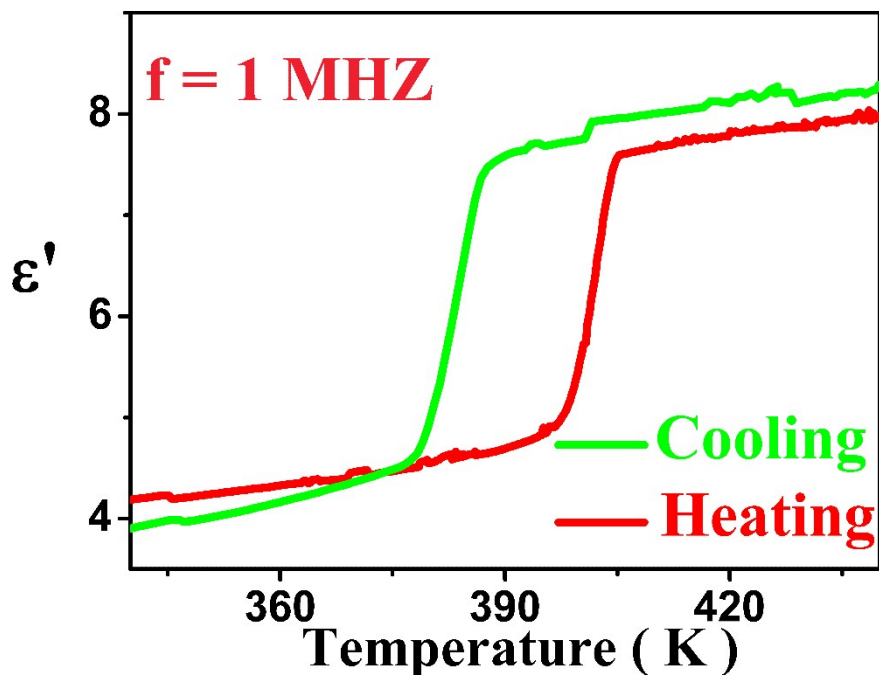

**Fig. S13** Temperature-dependence of the real part ( $\epsilon'$ ) of the flexibility thin films samples of **2** at 1 MHz upon heating and cooling.

**Table S1** Summary of crystallographic data for compounds **1** and **2**

|                                                               | [C <sub>3</sub> H <sub>9</sub> Cl <sub>2</sub> NO] <sub>2</sub> [CdCl <sub>4</sub> ] ( <b>1</b> ) |                                                                                 | [C <sub>3</sub> H <sub>9</sub> Cl <sub>2</sub> NO] <sub>2</sub> [MnCl <sub>4</sub> ] ( <b>2</b> ) |                                                                                 |
|---------------------------------------------------------------|---------------------------------------------------------------------------------------------------|---------------------------------------------------------------------------------|---------------------------------------------------------------------------------------------------|---------------------------------------------------------------------------------|
| Temperature(K)                                                | RTP(293K)                                                                                         | LTP(103K)                                                                       | RTP(293K)                                                                                         | LTP(103K)                                                                       |
| Empirical formula                                             | C <sub>12</sub> H <sub>30</sub> Cl <sub>6</sub> CdN <sub>2</sub> O <sub>2</sub>                   | C <sub>12</sub> H <sub>30</sub> Cl <sub>6</sub> CdN <sub>2</sub> O <sub>2</sub> | C <sub>12</sub> H <sub>30</sub> Cl <sub>6</sub> MnN <sub>2</sub> O <sub>2</sub>                   | C <sub>12</sub> H <sub>30</sub> Cl <sub>6</sub> MnN <sub>2</sub> O <sub>2</sub> |
| Formula weight                                                | 558.47                                                                                            | 558.47                                                                          | 502.02                                                                                            | 502.02                                                                          |
| Crystal system                                                | Monoclinic                                                                                        | Monoclinic                                                                      | Monoclinic                                                                                        | Monoclinic                                                                      |
| Space group                                                   | C2/c                                                                                              | C2/c                                                                            | C2/c                                                                                              | C2/c                                                                            |
| <i>a</i> (Å)                                                  | 16.440 (3)                                                                                        | 16.407 (14)                                                                     | 16.394 (16)                                                                                       | 16.287 (12)                                                                     |
| <i>b</i> (Å)                                                  | 9.787 (2)                                                                                         | 9.691 (7)                                                                       | 9.763 (9)                                                                                         | 9.623 (7)                                                                       |
| <i>c</i> (Å)                                                  | 15.935 (3)                                                                                        | 15.708 (13)                                                                     | 15.901 (15)                                                                                       | 15.636 (12)                                                                     |
| $\alpha$ (deg)                                                | 90.00                                                                                             | 90.00                                                                           | 90.00                                                                                             | 90.00                                                                           |
| $\beta$ (deg)                                                 | 113.23 (3)                                                                                        | 113.897 (13)                                                                    | 112.971 (14)                                                                                      | 113.41 (4)                                                                      |
| $\gamma$ (deg)                                                | 90.00                                                                                             | 90.00                                                                           | 90.00                                                                                             | 90.00                                                                           |
| Volume (Å <sup>3</sup> )                                      | 2356.1 (8)                                                                                        | 2283 (3)                                                                        | 2343 (4)                                                                                          | 2249 (3)                                                                        |
| Radiation type                                                | Mo-K $\alpha$                                                                                     | Mo-K $\alpha$                                                                   | Mo-K $\alpha$                                                                                     | Mo-K $\alpha$                                                                   |
| Absorption correction                                         | Multi-scan                                                                                        | Multi-scan                                                                      | Multi-scan                                                                                        | Multi-scan                                                                      |
| <i>Z</i> , Calculated density                                 | 4, 1.577 Mg m <sup>-3</sup>                                                                       | 4, 1.624 Mg m <sup>-3</sup>                                                     | 4, 1.423 Mg m <sup>-3</sup>                                                                       | 4, 1.483 Mg m <sup>-3</sup>                                                     |
| <i>F</i> (000)                                                | 1128                                                                                              | 1124                                                                            | 1036                                                                                              | 1036                                                                            |
| <i>T</i> <sub>min/max</sub>                                   | 0.964/0.970                                                                                       | 0.9/1.0                                                                         | 0.964/0.970                                                                                       | 0.9/1.0                                                                         |
| Goodness-of-fit on <i>F</i> <sup>2</sup>                      | 1.052                                                                                             | 1.059                                                                           | 1.122                                                                                             | 1.131                                                                           |
| <i>R</i> <sub>1</sub> [ <i>I</i> > 2 <i>s</i> ( <i>I</i> )]   | 0.076                                                                                             | 0.076                                                                           | 0.092                                                                                             | 0.079                                                                           |
| w <i>R</i> <sub>2</sub> [ <i>I</i> > 2 <i>s</i> ( <i>I</i> )] | 0.215                                                                                             | 0.237                                                                           | 0.346                                                                                             | 0.295                                                                           |

**Table S2 Selected structural data for 1 under 103K**

---

*Bond lengths / Å and bond angles / °*

---

|                       |            |                     |            |
|-----------------------|------------|---------------------|------------|
| Cd(1)-Cl(1)           | 2.459(4)   | Cd(1)-Cl(1)#1       | 2.459(4)   |
| Cd(1)-Cl(2)           | 2.447(3)   | Cd(1)-Cl(2)#1       | 2.447(3)   |
| Cl(3)-C(1)            | 1.727(14)  | C(1)-C(2)           | 1.496(17)  |
| C(3)-C(2)             | 1.42(2)    | N(1)-C(3)           | 1.483(14)  |
| N(1)-C(4)             | 1.480(18)  | N(1)-C(5)           | 1.493(18)  |
| N(1)-C(6)             | 1.426(18)  | C(2)-O(1)           | 1.57(2)    |
| Cl(1)-Cd(1)-Cl(1)#1   | 110.6(2)   | Cl(1)#1-Cd(1)-Cl(2) | 107.91(14) |
| Cl(1)#1-Cd(1)-Cl(2)#1 | 110.89(17) | Cl(1)-Cd(1)-Cl(2)   | 110.89(17) |
| Cl(1)-Cd(1)-Cl(2)#1   | 107.91(14) | Cl(2)#1-Cd(1)-Cl(2) | 108.63(18) |
| C(3)-N(1)-C(5)        | 113.1(11)  | C(3)-N(1)-C(4)      | 110.9(13)  |
| C(3)-N(1)-C(6)        | 107.0(12)  | C(5)-N(1)-C(4)      | 107.9(12)  |
| C(4)-N(1)-C(6)        | 108.9(11)  | C(5)-N(1)-C(6)      | 109.0(13)  |
| C(2)-C(1)-Cl(3)       | 113.7(11)  | O(1)-C(2)-C(1)      | 102.8(14)  |
| N(1)-C(3)-C(2)        | 119.4(14)  | C(3)-C(2)-O(1)      | 102.7(14)  |
| C(3)-C(2)-C(1)        | 114.0(14)  |                     |            |

---

Symmetry transformations used to generate equivalent atoms: #1 -x+1, y, -z+1/2.

**Table S3 Selected structural data for 1 under 293K**

---

*Bond lengths / Å and bond angles / °*

---

|                       |             |                     |            |
|-----------------------|-------------|---------------------|------------|
| Cd(1)-Cl(1)           | 2.4481 (12) | Cd(1)-Cl(1)#1       | 2.4481(12) |
| Cd(1)-Cl(2)           | 2.4336 (11) | Cd(1)-Cl(2)#1       | 2.4336(11) |
| Cl(3)-C(1)            | 1.769(2)    | Cl(3A)-C(1A)        | 1.772(3)   |
| C(1)-C(2)             | 1.523(3)    | C(1A)-C(2A)         | 1.515(3)   |
| C(3)-C(2)             | 1.502(4)    | C(3A)-C(2A)         | 1.479(5)   |
| N(1)-C(3)             | 1.504(3)    | N(1A)-C(3A)         | 1.502(4)   |
| N(1)-C(4)             | 1.500(4)    | N(1A)-C(4A)         | 1.502(4)   |
| N(1)-C(5)             | 1.508(5)    | N(1A)-C(5A)         | 1.505(6)   |
| N(1)-C(6)             | 1.493(5)    | N(1A)-C(6A)         | 1.493(5)   |
| C(2)-O(1)             | 1.507(4)    | C(2A)-O(1A)         | 1.496(5)   |
| Cl(1)-Cd(1)-Cl(1)#1   | 111.16(6)   | Cl(1)#1-Cd(1)-Cl(2) | 107.15(4)  |
| Cl(1)#1-Cd(1)-Cl(2)#1 | 111.25(4)   | Cl(1)-Cd(1)-Cl(2)   | 111.25(4)  |
| Cl(1)-Cd(1)-Cl(2)#1   | 107.15(4)   | Cl(2)#1-Cd(1)-Cl(2) | 108.90(5)  |

---

|                 |            |                    |          |
|-----------------|------------|--------------------|----------|
| C(3)-N(1)-C(5)  | 110.9(3)   | C(5A)-N(1A)-C(3A)  | 95.5(3)  |
| C(3)-N(1)-C(4)  | 115.6(4)   | C(4A)-N(1A)-C(3A)  | 146.4(5) |
| C(3)-N(1)-C(6)  | 92.4(3)    | C(6A)-N(1A)-C(3A)  | 105.8(3) |
| C(5)-N(1)-C(4)  | 105.0(3)   | C(4A)-N(1A)-C(5A)  | 102.6(5) |
| C(4)-N(1)-C(6)  | 123.9(3)   | C(4A)-N(1A)-C(6A)  | 91.2(5)  |
| C(5)-N(1)-C(6)  | 108.6(4)   | C(5A)-N(1A)-C(6A)  | 116.4(4) |
| C(2)-C(1)-Cl(3) | 113.41(18) | C(2A)-C(1A)-Cl(3A) | 114.6(2) |
| O(1)-C(2)-C(1)  | 108.3(3)   | O(1A)-C(2A)-C(1A)  | 108.5(3) |
| N(1)-C(3)-C(2)  | 115.2(2)   | C(2A)-C(3A)-N(1A)  | 91.2(2)  |
| C(3)-C(2)-O(1)  | 107.2(2)   | C(3A)-C(2A)-O(1A)  | 111.5(4) |
| C(3)-C(2)-C(1)  | 108.7(2)   | C(3A)-C(2A)-C(1A)  | 110.6(2) |

Symmetry transformations used to generate equivalent atoms: #1 -x+1, y, -z+1/2.

**Table S4 Selected structural data for 1 under 103K**

| <i>Bond lengths / Å and bond angles / °</i> |            |                     |            |
|---------------------------------------------|------------|---------------------|------------|
| Mn(1)-Cl(1)                                 | 2.351(2)   | Mn(1)-Cl(1)#1       | 2.351(2)   |
| Mn(1)-Cl(2)                                 | 2.367(2)   | Mn(1)-Cl(2)#1       | 2.367(2)   |
| Cl(3)-C(1)                                  | 1.726(8)   | C(1)-C(2)           | 1.571(11)  |
| C(3)-C(2)                                   | 1.423(15)  | N(1)-C(3)           | 1.537(11)  |
| N(1)-C(4)                                   | 1.545(10)  | N(1)-C(5)           | 1.452(13)  |
| N(1)-C(6)                                   | 1.476(10)  | C(2)-O(1)           | 1.419(13)  |
| Cl(1)-Mn(1)-Cl(1)#1                         | 109.58(12) | Cl(1)#1-Mn(1)-Cl(2) | 109.83(10) |
| Cl(1)#1-Mn(1)-Cl(2)#1                       | 108.53(9)  | Cl(1)-Mn(1)-Cl(2)   | 108.53(9)  |
| Cl(1)-Mn(1)-Cl(2)#1                         | 109.83(10) | Cl(2)#1-Mn(1)-Cl(2) | 110.55(14) |
| C(3)-N(1)-C(5)                              | 106.2(8)   | C(3)-N(1)-C(4)      | 113.2(7)   |
| C(3)-N(1)-C(6)                              | 113.3(6)   | C(5)-N(1)-C(4)      | 109.0(6)   |
| C(4)-N(1)-C(6)                              | 105.4(7)   | C(5)-N(1)-C(6)      | 109.8(8)   |
| C(2)-C(1)-Cl(3)                             | 106.6(6)   | O(1)-C(2)-C(1)      | 110.5(8)   |
| N(1)-C(3)-C(2)                              | 118.0(9)   | C(3)-C(2)-O(1)      | 110.5(8)   |
| C(3)-C(2)-C(1)                              | 106.3(8)   |                     |            |

Symmetry transformations used to generate equivalent atoms: #1 -x, y, -z+1/2.

**Table S5 Selected structural data for 2 under 293K**

| <i>Bond lengths / Å and bond angles / °</i> |             |               |            |
|---------------------------------------------|-------------|---------------|------------|
| Mn(1)-Cl(1)                                 | 2.3591 (17) | Mn(1)-Cl(1)#1 | 2.3591(17) |
| Mn(1)-Cl(2)                                 | 2.3756 (19) | Mn(1)-Cl(2)#1 | 2.3756(19) |



|                       |            |                     |            |
|-----------------------|------------|---------------------|------------|
| Cl(3)-C(1)            | 1.766 (4)  | Cl(3A)-C(1A)        | 1.7458(4)  |
| C(1)-C(2)             | 1.519 (4)  | C(1A)-C(2A)         | 1.551(4)   |
| C(3)-C(2)             | 1.489 (5)  | C(3A)-C(2A)         | 1.469(5)   |
| N(1)-C(3)             | 1.488 (4)  | N(1A)-C(3A)         | 1.521(4)   |
| N(1)-C(4)             | 1.496 (6)  | N(1A)-C(4A)         | 1.493(5)   |
| N(1)-C(5)             | 1.494 (6)  | N(1A)-C(5A)         | 1.496(6)   |
| N(1)-C(6)             | 1.501 (6)  | N(1A)-C(6A)         | 1.508(6)   |
| C(2)-O(1)             | 1.499 (5)  | C(2A)-O(1A)         | 1.487(5)   |
| Cl(1)-Mn(1)-Cl(1)#1   | 109.15 (8) | Cl(1)#1-Mn(1)-Cl(2) | 110.78(8)  |
| Cl(1)#1-Mn(1)-Cl(2)#1 | 107.99 (8) | Cl(1)-Mn(1)-Cl(2)   | 107.99(8)  |
| Cl(1)-Mn(1)-Cl(2)#1   | 110.78 (8) | Cl(2)#1-Mn(1)-Cl(2) | 110.16(9)  |
| C(3)-N(1)-C(5)        | 102.6 (4)  | C(5A)-N(1A)-C(3A)   | 98.8(4)    |
| C(3)-N(1)-C(4)        | 126.8 (4)  | C(4A)-N(1A)-C(3A)   | 101.4(4)   |
| C(3)-N(1)-C(6)        | 115.3 (4)  | C(6A)-N(1A)-C(3A)   | 111.6(3)   |
| C(5)-N(1)-C(4)        | 117.4 (4)  | C(4A)-N(1A)-C(5A)   | 97.7(6)    |
| C(4)-N(1)-C(6)        | 82.2 (5)   | C(4A)-N(1A)-C(6A)   | 126.3(5)   |
| C(5)-N(1)-C(6)        | 111.4 (5)  | C(5A)-N(1A)-C(6A)   | 116.7(6)   |
| C(2)-C(1)-Cl(3)       | 114.7 (3)  | C(2A)-C(1A)-Cl(3A)  | 112.04(18) |
| O(1)-C(2)-C(1)        | 109.3 (4)  | O(1A)-C(2A)-C(1A)   | 106.4(3)   |
| N(1)-C(3)-C(2)        | 115.2 (3)  | C(2A)-C(3A)-N(1A)   | 109.8(3)   |
| C(3)-C(2)-O(1)        | 111.0 (3)  | C(3A)-C(2A)-O(1A)   | 111.9(4)   |
| C(3)-C(2)-C(1)        | 108.0 (3)  | C(3A)-C(2A)-C(1A)   | 110.9(3)   |

Symmetry transformations used to generate equivalent atoms: #1 -x, y, -z+1/2.
